# Supplementary material for: Two Ligand-Binding Sites on SARS-CoV-2 Non-Structural Protein 1 Revealed by Fragment-Based X-ray Screening
Source: MDPI journal article supplement (doi:10.3390/ijms232012448), 2022-10-18
Supplement: s1 [file s1]

# Two Ligand-Binding Sites on SARS-CoV-2 Non-Structural Protein 1 Revealed by Fragment-Based X-ray Screening

Shumeng Ma<sup>1</sup>, Shymaa Damfo<sup>1</sup>, Jiaqi Lou<sup>1</sup>, Nikos Pinotsis<sup>2</sup>, Matthew W. Bowler<sup>3</sup>,  
Shozeb Haider<sup>1,4</sup> and Frank Kozielski<sup>1</sup>

<sup>1</sup>School of Pharmacy, University College London, 29-39 Brunswick Square, London WC1N 1AX, UK

<sup>2</sup>Institute of Structural and Molecular Biology, Birkbeck College, London WC1E 7HX, UK

<sup>3</sup>European Molecular Biology Laboratory, 38000 Grenoble, France

<sup>4</sup>UCL Centre for Advanced Research Computing, University College London, London WC1H 9RN, UK

## Content

|                                                                                                                                            |   |
|--------------------------------------------------------------------------------------------------------------------------------------------|---|
| Table S1. Crystal images with crystallisation conditions                                                                                   | 2 |
| Table S2. Data collection and refinement statistics for SARS-CoV-2 nsp1 <sub>10-126</sub> -fragment complexes discussed in this manuscript | 3 |

**Table S1:** Representative crystallisation conditions and images of three types of SARS-CoV-2 nsp1<sub>10-126</sub> crystals. All crystals grew at 18°C at protein concentrations between 15 and 27 mg/mL.

| Commercial screens | Crystallisation condition                                                                                            | Crystal images                                                                                                                                                           |
|--------------------|----------------------------------------------------------------------------------------------------------------------|--------------------------------------------------------------------------------------------------------------------------------------------------------------------------|
| Index™             | 0.1 HEPES pH 7.5, 25% w/v PEG3350                                                                                    | 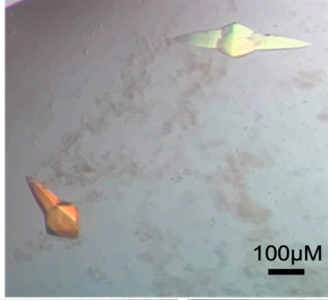                                                                                       |
| Morpheus®          | 0.12 M Ethylene glycol, 0.1 M Imidazole, 0.1 M MES monohydrate acid pH 6.5, 20% v/v Ethylene glycol, 10% w/v PEG8000 |                                                                                                                                                                          |
| JCSG-plus™         | 0.2 M Ammonium formate, 20% w/v PEG3350                                                                              |   |

**Table S2.** Data collection, data processing, and model refinement statistics for five nsp1<sub>10-126</sub>-fragment complexes from SARS-CoV-2. Data in parenthesis correspond to the highest resolution shell.

|                                                                        | <b>Nsp1-11C6</b>                                         | <b>Nsp1-10B6</b>                                         | <b>Nsp1-5E11</b>                                         |
|------------------------------------------------------------------------|----------------------------------------------------------|----------------------------------------------------------|----------------------------------------------------------|
| <b>PDB ID</b>                                                          | 8AZ9                                                     | 8AYS                                                     | 8ASQ                                                     |
| <b>Wavelength [Å]</b>                                                  | 0.9655                                                   | 0.9655                                                   | 0.9655                                                   |
| <b>Resolution range [Å]</b>                                            | 35.63 - 1.42 (1.471 - 1.42)                              | 35.51 - 1.37 (1.419 - 1.37)                              | 32.58 - 1.15 (1.191 - 1.15)                              |
| <b>Space group</b>                                                     | P4 <sub>3</sub> 2 <sub>1</sub> 2                         | P4 <sub>3</sub> 2 <sub>1</sub> 2                         | P4 <sub>3</sub> 2 <sub>1</sub> 2                         |
| <b>Unit cell parameters (Å, °)</b>                                     | $a=b=36.817$ , $c=141.205$ ,<br>$\alpha=\beta=\gamma=90$ | $a=b=36.6882$ , $c=140.98$ ,<br>$\alpha=\beta=\gamma=90$ | $a=b=36.705$ , $c=141.491$ ,<br>$\alpha=\beta=\gamma=90$ |
| <b>Total reflections</b>                                               | 136107 (14061)                                           | 192589 (3956)                                            | 313412 (27576)                                           |
| <b>Unique reflections</b>                                              | 19225 (1872)                                             | 19842 (1315)                                             | 35543 (3461)                                             |
| <b>Multiplicity</b>                                                    | 7.1 (7.5)                                                | 9.7 (3.0)                                                | 8.8 (8.0)                                                |
| <b>Completeness [%]</b>                                                | 99.46 (99.57)                                            | 93.33 (63.87)                                            | 96.69 (100.00)                                           |
| <b>Mean I/sigma(I)</b>                                                 | 20.46 (2.85)                                             | 23.83 (1.21)                                             | 9.77 (0.95)                                              |
| <b>Wilson B-factor (Å<sup>2</sup>)</b>                                 | 18.20                                                    | 13.88                                                    | 14.28                                                    |
| <b>R-meas [%]</b>                                                      | 5.202 (67.27)                                            | 5.332 (19.74)                                            | 9.982 (131.60)                                           |
| <b>CC<sub>1/2</sub></b>                                                | 0.999 (0.838)                                            | 0.999 (0.938)                                            | 0.997 (0.560)                                            |
| <b>R<sub>cryst</sub>/R<sub>free</sub> [%]</b>                          | 15.04 (20.81) / 14.67 (18.00)                            | 14.55 (17.30) / 15.53 (16.06)                            | 20.16 (30.74) / 25.19 (34.72)                            |
| <b>Total no. of non-hydrogen atoms (protein)</b>                       | 1094                                                     | 1082                                                     | 960                                                      |
| <b>No. of protein/ligand/solvent atoms</b>                             | 959 / 26/ 120                                            | 941 / 21/ 128                                            | 876 / 28/ 70                                             |
| <b>Average B-factor/protein/ligands/solvent</b>                        | 25.90 / 23.66 / 82.69 / 37.31                            | 20.86 / 18.85 / 46.03 / 33.09                            | 23.93 / 22.61 / 60.46 / 33.04                            |
| <b>RMSD (bonds, angles)</b>                                            | 0.012 / 1.33                                             | 0.012 / 1.26                                             | 0.012 / 1.34                                             |
| <b>Ramachandran<br/>favoured/allowed/outliers/rotamer outliers [%]</b> | 97.32 / 2.68 / 0.00 / 1.87                               | 97.32 / 2.68 / 0.00 / 0.00                               | 99.10 / 0.90 / 0.00 / 1.06                               |
| <b>Clashscore</b>                                                      | 7.63                                                     | 9.36                                                     | 3.92                                                     |

**Continuation Table S2.** Data collection, data processing, and model refinement statistics for five nsp1<sub>10-126</sub>-fragment complexes from SARS-CoV-2. Data in parenthesis correspond to the highest resolution shell.

|                                                                        | <b>Nsp1-8E6</b>                                          | <b>Nsp1-7H2</b>                                          |
|------------------------------------------------------------------------|----------------------------------------------------------|----------------------------------------------------------|
| <b>PDB ID</b>                                                          | 8AZ8                                                     | 8AYW                                                     |
| <b>Wavelength [Å]</b>                                                  | 0.9655                                                   | 0.9655                                                   |
| <b>Resolution range [Å]</b>                                            | 35.34 - 1.18 (1.222 - 1.18)                              | 35.5 - 1.10 (1.139 - 1.10)                               |
| <b>Space group</b>                                                     | P4 <sub>3</sub> 2 <sub>1</sub> 2                         | P4 <sub>3</sub> 2 <sub>1</sub> 2                         |
| <b>Unit cell parameters (Å, °)</b>                                     | $a=b=36.643$ , $c=141.366$ ,<br>$\alpha=\beta=\gamma=90$ | $a=b=36.524$ , $c=141.988$ ,<br>$\alpha=\beta=\gamma=90$ |
| <b>Total reflections</b>                                               | 297661 (30739)                                           | 458335 (28515)                                           |
| <b>Unique reflections</b>                                              | 30502 (3207)                                             | 40253 (3891)                                             |
| <b>Multiplicity</b>                                                    | 9.8 (9.6)                                                | 11.4 (7.3)                                               |
| <b>Completeness [%]</b>                                                | 92.79 (100.00)                                           | 99.89 (99.01)                                            |
| <b>Mean I/sigma(I)</b>                                                 | 18.77 (2.19)                                             | 15.90 (1.32)                                             |
| <b>Wilson B-factor (Å<sup>2</sup>)</b>                                 | 15.64                                                    | 13.51                                                    |
| <b>R-meas [%]</b>                                                      | 5.976 (97.11)                                            | 7.452 (130.9)                                            |
| <b>CC<sub>1/2</sub></b>                                                | 0.998 (0.795)                                            | 0.998 (0.589)                                            |
| <b>R<sub>cryst</sub>/R<sub>free</sub> [%]</b>                          | 16.65 (19.89) / 20.81 (25.73)                            | 17.04 (26.77) / 19.09 (27.97)                            |
| <b>Total no. of non-hydrogen atoms (protein)</b>                       | 970                                                      | 1032                                                     |
| <b>No. of protein/ligand/solvent atoms</b>                             | 878 / 24 / 81                                            | 919 / 20 / 103                                           |
| <b>Average B-factor/protein/ligands/solvent</b>                        | 24.22 / 22.96 / 54.47 / 33.70                            | 23.42 / 22.01 / 56.28 / 32.75                            |
| <b>RMSD (bonds, angles)</b>                                            | 0.012 / 1.40                                             | 0.012 / 1.36                                             |
| <b>Ramachandran<br/>favoured/allowed/outliers/rotamer outliers [%]</b> | 96.49 / 3.51 / 0.0 / 0.0                                 | 94.74 / 5.26 / 0.0 / 1.0                                 |
| <b>Clashscore</b>                                                      | 1.69                                                     | 5.89                                                     |
